# Supplementary material for: Accurate quantification of 5-Methylcytosine, 5-Hydroxymethylcytosine, 5-Formylcytosine, and 5-Carboxylcytosine in genomic DNA from breast cancer by chemical derivatization coupled with ultra performance liquid chromatography- electrospray quadrupole time of flight mass spectrometry analysis
Source: PubMed Central journal article supplement (PMC5710920; doi:10.18632/oncotarget.20093), 2017-08-09
Supplement: oncotarget-08-91248-s001.pdf [file oncotarget-08-91248-s001.pdf]

# Accurate quantification of 5-Methylcytosine, 5-Hydroxymethylcytosine, 5-Formylcytosine, and 5-Carboxylcytosine in genomic DNA from breast cancer by chemical derivatization coupled with ultra performance liquid chromatography- electrospray quadrupole time of flight mass spectrometry analysis

## SUPPLEMENTARY MATERIALS

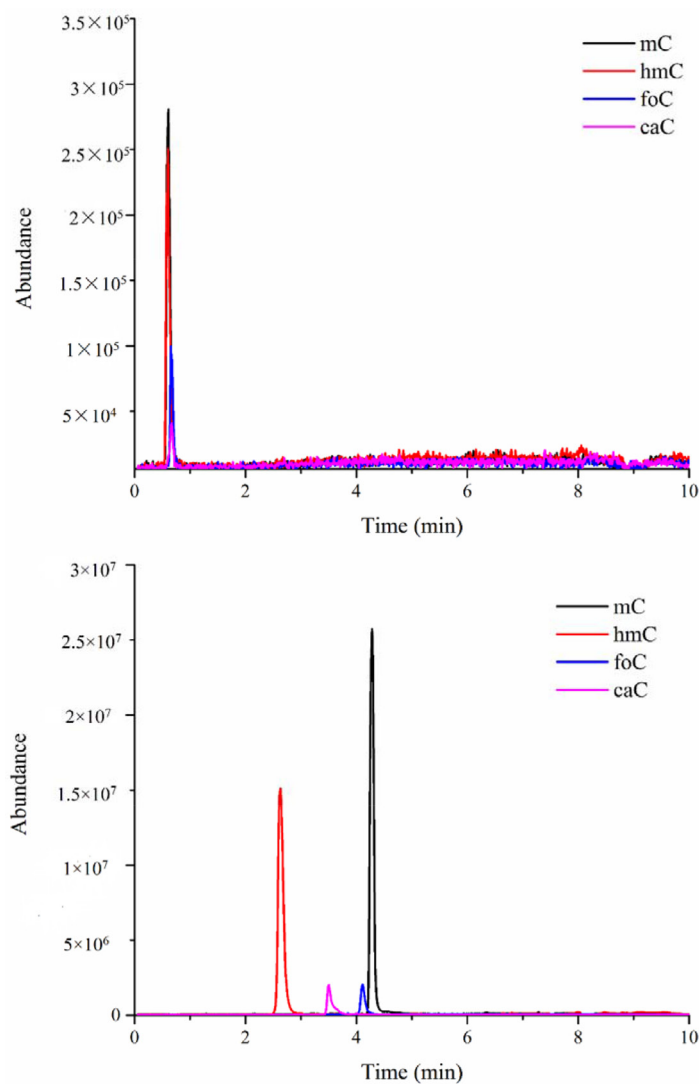

**Supplementary Figure 1:** LC-MS analysis of 5-mC, 5-hmC, 5-foC, and 5-caC before (A) and after (B) derivatization under optimized conditions.

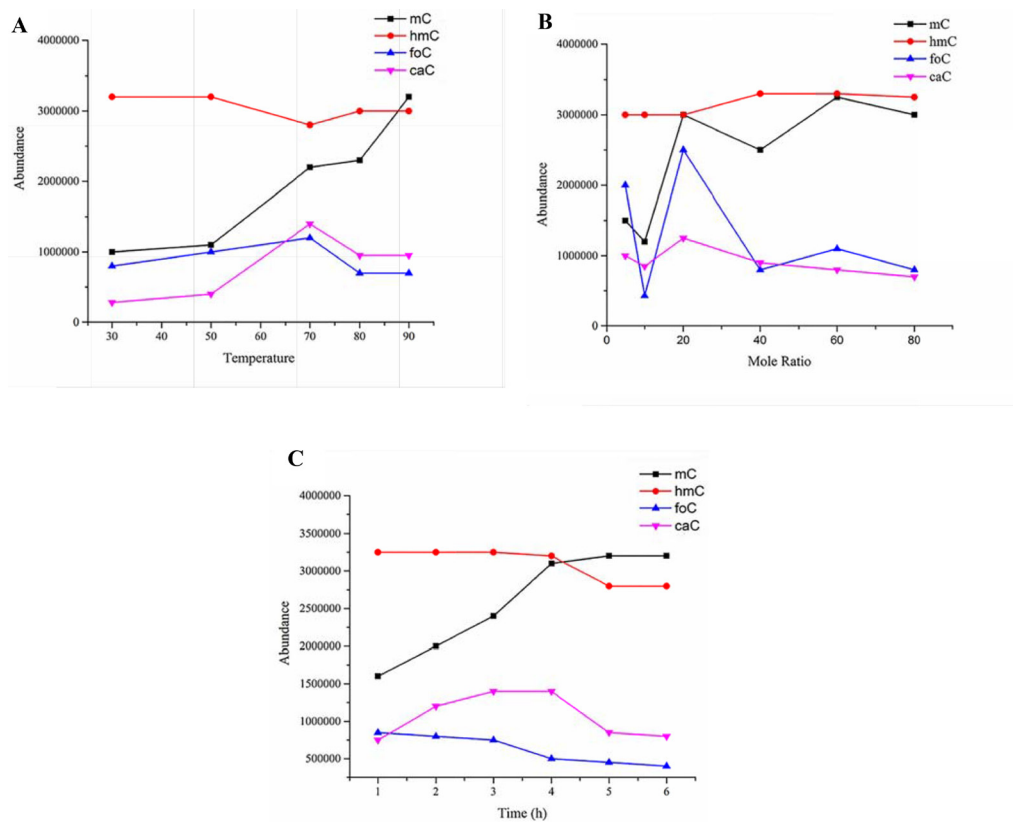

**Supplementary Figure 2:** Optimization of derivatization conditions for 5-mC, 5-hmC, 5-foC, and 5-caC in (A) reaction temperature; (B) ratio of the reagent; (C) reaction time.

**Supplementary Table 1: Linearities of 5-mC, 5-hmC, 5-foC, and 5-caC by derivatization coupled with LC-ESI-MS/MS analysis**

| Compound | Regression equation    | <i>r</i> | Linear range (pg/ $\mu$ L) | LLOQ (pg/ $\mu$ L) |
|----------|------------------------|----------|----------------------------|--------------------|
| mC       | $y = 478.89x + 3817$   | 0.9986   | 1.38~353                   | 1.38               |
| hmC      | $y = 680.73x + 2683.8$ | 0.9997   | 1.56~1000                  | 1.56               |
| foC      | $y = 820.66x - 599.68$ | 0.9996   | 1.56~100                   | 1.56               |
| caC      | $y = 1323x + 2148.4$   | 0.9993   | 0.78~100                   | 0.78               |

**Supplementary Table 2: Accuracy and stability for the detection of 5-mC, 5-hmC, 5-foC, and 5-caC by derivatization coupled with LC-ESI-MS/MS analysis (pg/ $\mu$ L)**

| Compound | Theoretical values | 24 h            |                   |         |
|----------|--------------------|-----------------|-------------------|---------|
|          |                    | Measured values | Accuracy (%)      | RSD (%) |
| 5-mC     | 1.5                | 1.5 $\pm$ 0.0   | 95.96 $\pm$ 2.29  | 2.9     |
|          | 22.0               | 23.0 $\pm$ 0.5  | 104.38 $\pm$ 2.74 | 3.2     |
|          | 265.5              | 249.0 $\pm$ 5.5 | 99.34 $\pm$ 2.13  | 2.6     |
| 5-hmC    | 1.5                | 1.5 $\pm$ 0.0   | 97.94 $\pm$ 2.81  | 3.5     |
|          | 125.0              | 135.5 $\pm$ 2.0 | 100.86 $\pm$ 1.31 | 1.6     |
|          | 750.0              | 780.0 $\pm$ 5.5 | 106.62 $\pm$ 0.76 | 0.9     |
| 5-foC    | 1.5                | 1.5 $\pm$ 0.0   | 101.11 $\pm$ 4.63 | 5.6     |
|          | 12.5               | 15.0 $\pm$ 1.0  | 100.49 $\pm$ 5.34 | 6.5     |
|          | 75.0               | 84.5 $\pm$ 1.0  | 111.78 $\pm$ 1.14 | 1.3     |
| 5-caC    | 1.0                | 1.0 $\pm$ 0.0   | 93.97 $\pm$ 4.00  | 3.8     |
|          | 12.5               | 13.5 $\pm$ 0.5  | 99.98 $\pm$ 2.74  | 3.4     |
|          | 75.0               | 74.0 $\pm$ 3.5  | 100.77 $\pm$ 4.43 | 5.4     |

**Supplementary Table 3: Intra- and inter-batch precision for the determination of 5-mC, 5-hmC, 5-foC, and 5-caC by derivatization coupled with LC-ESI-MS/MS analysis (pg/μL)**

| Compound | Theoretical values | Intra-batch (n = 5) |                  |         | Inter-batch (n = 15) |                 |         |
|----------|--------------------|---------------------|------------------|---------|----------------------|-----------------|---------|
|          |                    | Measured values     | Accuracy (%)     | RSD (%) | Theoretical values   | Accuracy (%)    | RSD (%) |
| 5-mC     | 1.5                | 1.5                 | 96.650 ± 3.402   | 6.3     | 1.5                  | 95.969 ± 2.294  | 5.1     |
|          | 22.0               | 22.0                | 98.651 ± 1.137   | 3.4     | 22.0                 | 104.389 ± 2.745 | 4.9     |
|          | 265.5              | 250.5               | 102.458 ± 1.112  | 3.1     | 265.5                | 99.342 ± 2.132  | 3.4     |
| 5-hmC    | 1.6                | 1.6                 | 95.800 ± 4.318   | 5.5     | 1.6                  | 97.940 ± 2.811  | 5.5     |
|          | 125.0              | 134.0               | 102.301 ± 1.439  | 2.1     | 125.0                | 100.867 ± 1.319 | 2.6     |
|          | 750.0              | 789.0               | 104.398 ± 1.336  | 0.9     | 750.0                | 106.626 ± 0.767 | 1.6     |
| 5-foC    | 1.6                | 1.6                 | 114.794 ± 3.407  | 12.9    | 1.6                  | 101.112 ± 4.635 | 9.9     |
|          | 12.5               | 14.0                | 99.451 ± 5.372   | 7.1     | 12.5                 | 100.495 ± 5.345 | 5.2     |
|          | 75.0               | 79.5                | 109.378 ± 0.767  | 0.8     | 75.0                 | 111.782 ± 1.148 | 2.3     |
| 5-caC    | 1.0                | 1.0                 | 109.011 ± 15.053 | 9.1     | 1.0                  | 93.978 ± 4.009  | 7.2     |
|          | 12.5               | 13.5                | 96.988 ± 3.084   | 6.6     | 12.5                 | 99.989 ± 2.740  | 3.8     |
|          | 75.0               | 69.5                | 104.869 ± 2.522  | 5.1     | 75.0                 | 100.774 ± 4.430 | 5.2     |

**Supplementary Table 4: Quantification data of 5-mC, 5-hmC, 5-foC, and 5-caC in genome-wide of 24 pairs of human breast cancer tissues and matched tumor-adjacent normal tissues**

| NO. | Age | 5-mC (ng/2 μg)  |               | 5-hmC (ng/2 μg) |               | 5-foC (ng/2 μg) |               | 5-caC (ng/2 μg) |               |
|-----|-----|-----------------|---------------|-----------------|---------------|-----------------|---------------|-----------------|---------------|
|     |     | tumor           | adjacent      | tumor           | adjacent      | tumor           | adjacent      | tumor           | adjacent      |
| 1   | 59  | 4.947 ± 0.079** | 4.532 ± 0.071 | 1.655 ± 0.085** | 1.447 ± 0.122 | 0.403 ± 0.009** | 0.316 ± 0.015 | 0.062 ± 0.007** | 0.030 ± 0.004 |
| 2   | 48  | 3.190 ± 0.476** | 3.177 ± 0.070 | 1.232 ± 0.114** | 1.113 ± 0.008 | 0.502 ± 0.023** | 0.501 ± 0.009 | 0.179 ± 0.003** | 0.176 ± 0.023 |
| 3   | 55  | 9.983 ± 0.032** | 7.512 ± 0.717 | 4.236 ± 0.276** | 3.495 ± 0.266 | 0.308 ± 0.013** | 0.224 ± 0.014 | 0.030 ± 0.000** | 0.016 ± 0.003 |
| 4   | 36  | 4.955 ± 0.011** | 3.984 ± 0.047 | 2.241 ± 0.108** | 1.768 ± 0.020 | 0.529 ± 0.011** | 0.395 ± 0.004 | 0.142 ± 0.004** | 0.087 ± 0.007 |
| 5   | 44  | 8.879 ± 0.395** | 6.605 ± 0.096 | 1.761 ± 0.089** | 1.281 ± 0.077 | 0.581 ± 0.059** | 0.511 ± 0.063 | 0.221 ± 0.009** | 0.178 ± 0.018 |
| 6   | 61  | 7.601 ± 0.551** | 6.206 ± 0.218 | 1.344 ± 0.160** | 1.740 ± 0.098 | 0.505 ± 0.017** | 0.453 ± 0.029 | 0.261 ± 0.012** | 0.226 ± 0.016 |
| 7   | 64  | 6.804 ± 0.335** | 5.553 ± 0.312 | 4.113 ± 0.265** | 3.204 ± 0.032 | 0.533 ± 0.018** | 0.454 ± 0.010 | 0.149 ± 0.006** | 0.087 ± 0.005 |
| 8   | 66  | 5.228 ± 0.072** | 3.661 ± 0.093 | 2.287 ± 0.175** | 1.412 ± 0.120 | 0.581 ± 0.011** | 0.400 ± 0.007 | 0.145 ± 0.007** | 0.030 ± 0.004 |
| 9   | 58  | 9.301 ± 0.259** | 7.101 ± 0.324 | 4.363 ± 0.472** | 2.669 ± 0.167 | 0.347 ± 0.033** | 0.217 ± 0.005 | 0.023 ± 0.001** | 0.004 ± 0.000 |
| 10  | 39  | 5.080 ± 0.351** | 3.699 ± 0.204 | 2.683 ± 0.018** | 1.859 ± 0.023 | 0.570 ± 0.016** | 0.473 ± 0.007 | 0.158 ± 0.008** | 0.085 ± 0.005 |
| 11  | 51  | 7.219 ± 0.164** | 3.696 ± 0.165 | 1.472 ± 0.228** | 1.019 ± 0.103 | 0.526 ± 0.092** | 0.449 ± 0.069 | 0.241 ± 0.010** | 0.087 ± 0.009 |
| 12  | 78  | 2.600 ± 0.241** | 1.176 ± 0.028 | 0.906 ± 0.086** | 0.427 ± 0.065 | 0.583 ± 0.085** | 0.422 ± 0.037 | 0.248 ± 0.014** | 0.190 ± 0.014 |

\*\*P < 0.01 vs. adjacent

| NO. | Age | 5-mC (ng/2 μg)   |               | 5-hmC (ng/2 μg) |               | 5-foC (ng/2 μg) |               | 5-caC (ng/2 μg) |               |
|-----|-----|------------------|---------------|-----------------|---------------|-----------------|---------------|-----------------|---------------|
|     |     | tumor            | adjacent      | tumor           | adjacent      | tumor           | adjacent      | tumor           | adjacent      |
| 13  | 85  | 3.188 ± 0.053**  | 2.077 ± 0.275 | 0.670 ± 0.026** | 0.546 ± 0.065 | 0.511 ± 0.021** | 0.366 ± 0.014 | 0.197 ± 0.016** | 0.109 ± 0.007 |
| 14  | 38  | 10.745 ± 0.409** | 7.427 ± 0.150 | 3.243 ± 0.224** | 2.608 ± 0.139 | 0.289 ± 0.020** | 0.252 ± 0.010 | 0.021 ± 0.001** | 0.002 ± 0.000 |
| 15  | 59  | 3.427 ± 0.336**  | 3.248 ± 0.123 | 2.600 ± 0.064** | 1.806 ± 0.116 | 0.567 ± 0.019** | 0.434 ± 0.018 | 0.043 ± 0.005** | 0.012 ± 0.001 |
| 16  | 66  | 4.984 ± 0.196**  | 3.899 ± 0.057 | 3.214 ± 0.181** | 2.132 ± 0.102 | 0.551 ± 0.014** | 0.474 ± 0.012 | 0.172 ± 0.014** | 0.023 ± 0.002 |
| 17  | 43  | 5.350 ± 0.298**  | 4.658 ± 0.018 | 3.213 ± 0.241** | 2.086 ± 0.143 | 0.572 ± 0.013** | 0.470 ± 0.006 | 0.125 ± 0.007** | 0.059 ± 0.007 |
| 18  | 61  | 3.081 ± 0.272**  | 2.582 ± 0.188 | 0.639 ± 0.111** | 0.480 ± 0.036 | 0.461 ± 0.006** | 0.414 ± 0.017 | 0.096 ± 0.004** | 0.085 ± 0.036 |
| 19  | 45  | 10.231 ± 0.366** | 6.023 ± 0.416 | 4.383 ± 0.321** | 2.960 ± 0.204 | 0.323 ± 0.017** | 0.236 ± 0.009 | 0.021 ± 0.000** | 0.005 ± 0.000 |
| 20  | 64  | 3.813 ± 0.065**  | 3.516 ± 0.070 | 2.101 ± 0.105** | 1.495 ± 0.088 | 0.544 ± 0.008** | 0.353 ± 0.006 | 0.122 ± 0.008** | 0.029 ± 0.000 |
| 21  | 72  | 4.023 ± 0.187**  | 3.345 ± 0.092 | 0.686 ± 0.002** | 0.343 ± 0.057 | 0.635 ± 0.069** | 0.542 ± 0.021 | 0.199 ± 0.009** | 0.128 ± 0.020 |
| 22  | 47  | 3.436 ± 0.119**  | 2.481 ± 0.114 | 0.461 ± 0.029** | 0.365 ± 0.062 | 0.634 ± 0.051** | 0.436 ± 0.04  | 0.225 ± 0.023** | 0.166 ± 0.019 |
| 23  | 46  | 3.969 ± 0.225**  | 3.490 ± 0.137 | 0.495 ± 0.065** | 0.142 ± 0.007 | 0.570 ± 0.045** | 0.520 ± 0.011 | 0.229 ± 0.026** | 0.184 ± 0.010 |
| 24  | 33  | 3.415 ± 0.062**  | 2.392 ± 0.284 | 0.517 ± 0.031** | 0.401 ± 0.065 | 0.602 ± 0.024** | 0.519 ± 0.019 | 0.232 ± 0.004** | 0.176 ± 0.023 |

Data represent the mean and standard deviation of results from three independent measurements. \*\*P < 0.01 vs. adjacent.
